# Supplementary material for: Brain structure is linked to the association between family environment and behavioral problems in children in the ABCD study
Source: PubMed Central journal article supplement (PMC8213719; doi:10.1038/s41467-021-23994-0), 2021-06-18

---

## Supplementary Information

### **Brain structure is linked to the association between family environment and behavioral problems in children in the ABCD study**

Nature Communications (2021)

Weikang Gong<sup>1,#</sup>, Edmund T. Rolls<sup>2,3,4,5,#</sup>, Jingnan Du<sup>2,3,#</sup>, Jianfeng Feng<sup>2,3,4,6</sup>, Wei Cheng<sup>2,3,6,\*</sup>

1. Centre for Functional MRI of the Brain (FMRIB), Nuffield Department of Clinical Neurosciences, Wellcome Centre for Integrative Neuroimaging, University of Oxford, Oxford, OX3 9DU, UK.
2. Institute of Science and Technology for Brain-inspired Intelligence, Fudan University, Shanghai, 200433, China.
3. Key Laboratory of Computational Neuroscience and Brain-Inspired Intelligence, Fudan University, Ministry of Education, Shanghai, 200433, China.
4. Department of Computer Science, University of Warwick, Coventry, CV4 7AL, UK.
5. Oxford Centre for Computational Neuroscience, Oxford, UK.
6. Fudan ISTBI—ZJNU Algorithm Centre for Brain-inspired Intelligence, Zhejiang Normal University, Jinhua, China.

# These authors contributed equally to this work.

\* Corresponding author

Wei Cheng, Institute of Science and Technology for Brain-inspired Intelligence, Shanghai, 200433, China, E-mail address: wcheng@fudan.edu.cn.

---

**Questions used in the Family Conflict score and Parental Monitoring scores and the methods by which they were calculated.**

**Family Conflict score**

fes\_youth\_q1: We fight a lot in our family.

fes\_youth\_q2: Family members rarely become openly angry.

fes\_youth\_q3: Family members sometimes get so angry they throw things.

fes\_youth\_q4: Family members hardly ever lose their tempers.

fes\_youth\_q5: Family members often criticize each other.

fes\_youth\_q6: Family members sometimes hit each other.

fes\_youth\_q7: If there is a disagreement in our family, we try hard to smooth things over and keep the peace.

fes\_youth\_q8: Family members often try to one-up or outdo each other.

fes\_youth\_q9: In our family, we believe you don't ever get anywhere by raising your voice.

Family conflict score =  $(fes\_youth\_q1 + fes\_youth\_q2 + fes\_youth\_q3 + fes\_youth\_q4 + fes\_youth\_q5 + fes\_youth\_q6 + fes\_youth\_q7 + fes\_youth\_q8 + fes\_youth\_q9) * fes\_y\_ss\_fc\_nt / fes\_y\_ss\_fc\_na$ .

where fes\_y\_ss\_fc\_nt is the number of total questions and fes\_y\_ss\_fc\_na is the number of questions answered.

**Parental Monitoring score**

parent\_monitor\_q1\_y: How often do your parents/guardians know where you are?

parent\_monitor\_q2\_y: How often do your parents know who you are with when you are not at school and away from home?

parent\_monitor\_q3\_y: If you are at home when your parents or guardians are not, how often do you know how to get in touch with them?

parent\_monitor\_q4\_y: How often do you talk to your mom/dad or guardian about your plans for the coming day, such as your plans about what will happen at school or what you are going to do with friends?

parent\_monitor\_q5\_y: In an average week, how many times do you and your parents/guardians, eat dinner together?

Parental monitoring score =  $Mean (parent\_monitor\_q1\_y + parent\_monitor\_q2\_y + parent\_monitor\_q3\_y + parent\_monitor\_q4\_y + parent\_monitor\_q5\_y) / 5$

**Supplementary Table 1. All measures used in this study.**

| Measure                                                                                          | NDA Short Name | Description                                                                                                                                       |
|--------------------------------------------------------------------------------------------------|----------------|---------------------------------------------------------------------------------------------------------------------------------------------------|
| <b>Physical and Mental Health</b>                                                                |                |                                                                                                                                                   |
| ABCD Youth Anthropometrics Modified From PhenX (ANT)                                             | abcd_ant01     | Height, weight, waist circumference                                                                                                               |
| Adult Self Report Scores                                                                         | abcd_asrs01    | Adult Self Report summary scores                                                                                                                  |
| ABCD Youth Behavioral Inhibition/Behavioral Approach System Scales Modified from PhenX (BIS/BAS) | abcd_bisbas01  | Inhibition and reward seeking                                                                                                                     |
| ABCD Parent Child Behavior Checklist Raw Scores Aseba (CBCL)                                     | abcd_cbcl01    | Dimensional psychopathology, adaptive functioning                                                                                                 |
| Child Behavior Check List Scores                                                                 | abcd_cbcls01   | Child Behavior Check List summary scores                                                                                                          |
| ABCD Youth Edinburgh Handedness Inventory Short Form (EHIS)                                      | abcd_ehis01    | Handedness, laterality quotient                                                                                                                   |
| ABCD Youth Diagnostic Interview for DSM-5 (KSADS-5)                                              | abcd_ksad501   | Mental health diagnosis - youth questions                                                                                                         |
| ABCD Sum Scores Mental Health Parent                                                             | abcd_mhp01     | Mental Health summary scores - parent surveys                                                                                                     |
| ABCD Parent Medical History Questionnaire (MHX)                                                  | abcd_mx01      | Medical history and health services utilization                                                                                                   |
| ABCD Parent Ohio State Traumatic Brain Injury Screen-Short Modified (OTBI)                       | abcd_otbi01    | Traumatic brain injury of youth                                                                                                                   |
| ABCD Parent General Behavior Inventory-Mania (PGBI)                                              | abcd_pgbi01    | Subsyndromal mania                                                                                                                                |
| ABCD Parent Pubertal Development Scale and Menstrual Cycle Survey History (PDMS)                 | abcd_ppdms01   | Pubertal stage and menstrual phase (for postmenarcheal girls) - parent survey                                                                     |
| ABCD Parent Sports and Activities Involvement Questionnaire (SAIQ)                               | abcd_saiq01    | Involvement in sports, music and hobbies, TBI risk                                                                                                |
| ABCD Parent Sleep Disturbance Scale for Children (SDS)                                           | abcd_sds01     | Sleep and sleep disorders                                                                                                                         |
| ABCD Youth Screen Time Survey (STQ)                                                              | abcd_stq01     | Screen time utilization - youth                                                                                                                   |
| ABCD Youth Snellen Vision Screener (SVS)                                                         | abcd_svs01     | Vision screening                                                                                                                                  |
| ABCD Sum Scores Traumatic Brain Injury                                                           | abcd_tbi01     | Traumatic brain injury of youth summary scores                                                                                                    |
| UPPS-P for Children Short Form (ABCD-version)                                                    | abcd_upps01    | Impulsivity                                                                                                                                       |
| ABCD Youth Diagnostic Interview for DSM-5 Background Items (KSADS-5)                             | abcd_ksad01    | School, sexual orientation                                                                                                                        |
| ABCD Youth Pubertal Development Scale and Menstrual Cycle Survey History (PDMS)                  | abcd_ypdms01   | Pubertal stage and menstrual phase (for postmenarcheal girls) - youth survey                                                                      |
| ABCD Youth Risk Behavior Survey Exercise Physical Activity (YRB)                                 | abcd_yrb01     | Physical exercise                                                                                                                                 |
| ABCD Youth Resilience Scale (YRS)                                                                | abcd_ysr01     | Resilience (religiosity, friends)                                                                                                                 |
| ABCD Developmental History Questionnaire                                                         | dhx01          | Prenatal exposure before and during pregnancy - medications, drugs alcohol, tobacco                                                               |
| ABCD Parent Diagnostic Interview for DSM-5 Background Items Full (KSADS-5)                       | dibf01         | School, family, social relations                                                                                                                  |
| ABCD Family History Assessment Part 1                                                            | fhxp101        | Family history of psychopathology and substance use (for biological or adoptive parent)                                                           |
| ABCD Family History Assessment Part 2                                                            | fhxp201        | Family history of psychopathology and substance use (for biological or adoptive parent)                                                           |
| ABCD Parent Medications Survey Inventory Modified from PhenX (PMP)                               | medsy01        | Medications taken in the last two weeks                                                                                                           |
| ABCD Parent Adult Self Report Raw Scores Aseba (ASR)                                             | pasr01         | Parent dimensional psychopathology                                                                                                                |
| ABCD Parent Demographics Survey?                                                                 | pdem01         | Demographics, race, gender, family structure, SES, education, occupation (includes Native American Acculturation Scale)                           |
| ABCD Prodromal Psychosis Scale                                                                   | pps01          | Prodromal psychosis levels                                                                                                                        |
| ABCD Parent Screen Time Survey (STQ)                                                             | stq01          | Screen time utilization - parent                                                                                                                  |
| <b>Substance Use</b>                                                                             |                |                                                                                                                                                   |
| ABCD Parent Community Risk and Protective Factors (CRPF)                                         | abcd_crpf01    | Beliefs about drug availability (alcohol, nicotine, marijuana, ?other? drugs) along with questions about access and exposure to medical marijuana |
| ABCD Youth Participant Last Use Survey Day 1 2 3 4 (PLUS)                                        | abcd_plus01    | Tobacco/caffeine/medication usage in the last 24 hours - youth answers                                                                            |
| ABCD Youth Substance Use Interview                                                               | abcd_ysu01     | Measures included in Substance Use Interview are described below                                                                                  |
| ABCD Parent Participant Last Use Survey Day 2 3 4 (PLUS)                                         | plus01         | Tobacco/caffeine/medication usage in the last 24 hours - parent answers                                                                           |
| ABCD Parental Rules on Substance Use                                                             | prq01          | Parental substance use approval and rules                                                                                                         |
| <b>Culture and Environment</b>                                                                   |                |                                                                                                                                                   |
| ABCD Youth Family Environment Scale-Family Conflict Subscale Modified from PhenX (FES)           | abcd_fes01     | Family dynamics, cohesion, expressiveness, conflict                                                                                               |
| ABCD Parent Multi-Group Ethnic Identity-Revised Survey (MEIM)                                    | abcd_meim01    | Cultural affiliation                                                                                                                              |
| ABCD Youth Neighborhood Safety/Crime Survey Modified from PhenX (NSC)                            | abcd_nsc01     | Neighborhood risk and protective factors, crime                                                                                                   |
| ABCD Parent Neighborhood Safety/Crime Survey Modified from PhenX (NSC)                           | abcd_pnsc01    | Neighborhood risk and protective factors, crime                                                                                                   |
| Youth Prosocial Behavior Survey                                                                  | abcd_psb01     | Resilience                                                                                                                                        |
| ABCD Sum Scores Culture & Environment Parent                                                     | abcd_sscep01   | Culture and environment summary scores - parent surveys                                                                                           |
| ABCD Sum Scores Culture & Environment Youth                                                      | abcd_sscey01   | Culture and environment summary scores - youth surveys                                                                                            |
| ABCD Parent Vancouver Index of Acculturation-Short Survey (VIA)                                  | abcd_via01     | Acculturation                                                                                                                                     |
| ABCD Children's Report of Parental Behavioral Inventory                                          | crpb01         | Environment- family and religion                                                                                                                  |
| ABCD Parent Family Environment Scale-Family Conflict Subscale Modified from PhenX (FES)          | fes01          | Family dynamics, cohesion, expressiveness, conflict                                                                                               |
| ABCD Parent Mexican American Cultural Values Scale Modified (MACV)                               | macv01         | Familism, religion, independence, self-reliance                                                                                                   |
| ABCD Parent Acculturation Survey Modified from PhenX (ACC)                                       | pace01         | Cultural factors                                                                                                                                  |
| ABCD Parental Monitoring Survey                                                                  | pmq01          | Parental monitoring and supervision                                                                                                               |
| Parent Prosocial Behavior Survey                                                                 | psb01          | Resilience                                                                                                                                        |
| ABCD School Risk and Protective Factors Survey                                                   | srpf01         | School risk and protective factors                                                                                                                |
| ABCD Youth Acculturation Survey Modified from PhenX (ACC)                                        | yacc01         | Cultural factors                                                                                                                                  |
| <b>Neurocognition</b>                                                                            |                |                                                                                                                                                   |
| ABCD Pearson Scores                                                                              | absd_ps01      | Measures included in Pearson Scores are described below                                                                                           |
| ABCD Youth NIH TB Summary Scores                                                                 | abcd_tbs01     | Measures included in NIH TB Summary Scores are described below                                                                                    |
| ABCD TBX Demo                                                                                    | abcddemo01     | Demographics - age only                                                                                                                           |
| ABCD Little Man Task                                                                             | lmtp201        | Visuospatial processing flexibility, attention                                                                                                    |

| <b>Others</b>                                                                 |                   |                                                                                                                                                                               |
|-------------------------------------------------------------------------------|-------------------|-------------------------------------------------------------------------------------------------------------------------------------------------------------------------------|
| ABCD Youth Hair Sample                                                        | abcd_hers01       | Information collected by RAs at the time of collecting ~100 strands of hair for metabolites indicating substance use in past month or longer (e.g. time of day of collection) |
| ABCD Sum Scores Mental Health Youth                                           | Sum_Scores_mhy01  | Mental Health summary scores - youth surveys                                                                                                                                  |
| ABCD MRI Behavior MID                                                         | abcd_mid01        | Behavioral performance measures for MID task fMRI                                                                                                                             |
| ABCD Youth Monetary Incentive Delay (MID) Task Survey Post Scan Questionnaire | abcd_monet01      | Ratings of mood when viewing the different cues and receiving the different outcomes during the MID task to determine the effectiveness and value of wins and losses          |
| MR Findings                                                                   | abcd_mrfindings01 | Neuroradiology reports - scores, hydrocephalus and herniation                                                                                                                 |
| ABCD RA Scanning Checklist and Notes                                          | abcd_ra01         | Checklist used by site coordinators/research assistants prior to and during scanning sessions                                                                                 |
| Residential History Derived Scores                                            | abcd_rhds01       | Environmental risk                                                                                                                                                            |
| ABCD Screener                                                                 | abcd_screen01     | Eligibility screener and screener risk measures                                                                                                                               |
| ABCD MRI Behavior SST                                                         | abcd_sst01        | Behavioral performance measures for SST task fMRI                                                                                                                             |
| ABCD Youth Genetic Saliva (RUCDR)                                             | abcd_ygs01        | Information collected by RAs at the time of saliva collection for genetics studies (e.g., time of day of collection)                                                          |
| ABCD Youth Pre Scan Questionnaire 1                                           | abcd_ypre101      | Current mood ratings before completing MRI scan                                                                                                                               |
| ABCD Youth Post Scan Questionnaire 1                                          | abcd_ypsq101      | Current mood ratings after completing MRI scan                                                                                                                                |
| ABCD Youth Toxicology Test                                                    | abcd_ytt01        | Past day drug use - Oral Fluid Drager                                                                                                                                         |
| ACS Post Stratification Weights                                               | acspsw01          | ACS post stratification weights for demographic and socioeconomic measures, and family relationships table                                                                    |
| ABCD Youth Genetic Blood (RUCDR)                                              | bioct01           | Information collected by RAs at the time of venipuncture blood collection for genetics studies (e.g., time of day of collection)                                              |
| Processed MRI Data (used for minimally processed data)                        | fmrresults01      | Index of minimally processed data                                                                                                                                             |
| ABCD Pubertal Hormone Saliva                                                  | sph01             | Information collected by RAs at the time of collecting oral fluid to indicate current estradiol, testosterone, and DHEA levels (e.g., time of day of collection)              |

**Supplementary Table 2. Correlation of the family conflict and the parental monitoring score with the lifetime mental disorder diagnoses based on the KSADS assessment (abcd\_ksad501).**

| KSADS Items                                                                                                                          | Family Conflict |          | Parental Monitoring |          |
|--------------------------------------------------------------------------------------------------------------------------------------|-----------------|----------|---------------------|----------|
|                                                                                                                                      | t value         | p value  | t value             | p value  |
| Diagnosis - Bipolar I Disorder, current episode manic (F31.1x)                                                                       | 3.070           | 2.15E-03 | -2.231              | 2.57E-02 |
| Diagnosis - Bipolar I Disorder, current episode depressed, F31.3x                                                                    | 5.987           | 2.21E-09 | -3.147              | 1.65E-03 |
| Diagnosis - Bipolar I Disorder, currently hypomanic F31.0                                                                            | 2.355           | 1.85E-02 | -3.580              | 3.45E-04 |
| Diagnosis - Bipolar I Disorder, most recent past episode manic (F31.1x)                                                              | 5.469           | 4.63E-08 | -2.896              | 3.79E-03 |
| Diagnosis - Bipolar I Disorder, most recent past episode depressed (F31.1.3x)                                                        | 1.913           | 5.57E-02 | -0.288              | 7.73E-01 |
| Diagnosis - Bipolar II Disorder, currently hypomanic F31.81                                                                          | 1.410           | 1.59E-01 | -1.323              | 1.86E-01 |
| Diagnosis - Bipolar II Disorder, currently depressed F31.81                                                                          | 4.942           | 7.85E-07 | -0.898              | 3.69E-01 |
| Diagnosis - Bipolar II Disorder, most recent past hypomanic F31.81                                                                   | 6.746           | 1.61E-11 | -2.927              | 3.43E-03 |
| Diagnosis - Unspecified Bipolar and Related Disorder, current (F31.9)                                                                | 5.490           | 4.12E-08 | -3.753              | 1.76E-04 |
| Diagnosis - Unspecified Bipolar and Related Disorder, PAST (F31.9)                                                                   | 7.820           | 5.88E-15 | -2.673              | 7.54E-03 |
| Diagnosis - Major Depressive Disorder Present                                                                                        | 4.978           | 6.52E-07 | -4.683              | 2.87E-06 |
| Diagnosis - Major Depressive Disorder, Current, in Partial Remission (F32.4)                                                         | 2.593           | 9.52E-03 | -1.738              | 8.22E-02 |
| Diagnosis - Major Depressive Disorder, Past (F32.9)                                                                                  | 7.066           | 1.71E-12 | -6.191              | 6.24E-10 |
| Diagnosis - Persistent Depressive Disorder (Dysthymia) PAST F34.1                                                                    | 2.535           | 1.12E-02 | -0.812              | 4.17E-01 |
| Diagnosis - Unspecified Depressive Disorder Current (F32.9)                                                                          | 1.918           | 5.52E-02 | -0.733              | 4.64E-01 |
| Diagnosis - Unspecified Depressive Disorder PAST (F32.9)                                                                             | 5.659           | 1.57E-08 | -4.768              | 1.88E-06 |
| Diagnosis - Social Anxiety Disorder (F40.10) PRESENT                                                                                 | 3.278           | 1.05E-03 | -3.033              | 2.43E-03 |
| Diagnosis - Social Anxiety Disorder (F40.10) PAST                                                                                    | 1.312           | 1.89E-01 | -2.612              | 9.02E-03 |
| Diagnosis - Generalized Anxiety Disorder Present (F41.1)                                                                             | 2.713           | 6.68E-03 | -2.342              | 1.92E-02 |
| Diagnosis - Generalized Anxiety Disorder Past (F41.1)                                                                                | 3.899           | 9.74E-05 | -1.082              | 2.79E-01 |
| Diagnosis - Other Specified Anxiety Disorder (Social Anxiety Disorder, impairment, does not meet minimum duration), PAST, F41.8      | 3.111           | 1.87E-03 | -2.920              | 3.51E-03 |
| Diagnosis - Other Specified Anxiety Disorder (Generalized Anxiety Disorder, impairment, does not meet minimum duration) F41.8        | 2.223           | 2.62E-02 | -3.448              | 5.67E-04 |
| Diagnosis - Other Specified Anxiety Disorder (Generalized Anxiety Disorder, impairment, does not meet minimum duration), PAST, F41.8 | 4.551           | 5.39E-06 | -2.888              | 3.88E-03 |
| Diagnosis - SelfInjuriousBehaviorwithoutsuicidalintentPresent                                                                        | 8.213           | 2.22E-16 | -9.255              | <1.0E-10 |
| Diagnosis - SuicidalideationPassivePresent                                                                                           | 8.082           | 6.66E-16 | -8.312              | 1.11E-16 |
| Diagnosis - SuicidalideationActivenonspecificPresent                                                                                 | 9.495           | <1.0E-10 | -7.729              | 1.20E-14 |
| Diagnosis - SuicidalideationActivemethodPresent                                                                                      | 7.306           | 2.98E-13 | -7.698              | 1.52E-14 |
| Diagnosis - SuicidalideationActiveintentPresent                                                                                      | 5.122           | 3.09E-07 | -4.918              | 8.89E-07 |
| Diagnosis - SuicidalideationActiveplanPresent                                                                                        | 4.090           | 4.34E-05 | -5.881              | 4.23E-09 |
| Diagnosis - PreparatoryActionstowardimminentSuicidalbehaviorPresent                                                                  | 3.295           | 9.89E-04 | -4.829              | 1.40E-06 |
| Diagnosis - InterruptedAttemptPresent                                                                                                | 1.612           | 1.07E-01 | -2.583              | 9.82E-03 |
| Diagnosis - AbortedAttemptPresent                                                                                                    | 3.084           | 2.05E-03 | -2.443              | 1.46E-02 |
| Diagnosis - SuicideAttemptPresent                                                                                                    | 1.251           | 2.11E-01 | -1.690              | 9.10E-02 |
| Diagnosis - SelfInjuriousBehaviorwithoutsuicidalintentPast                                                                           | 6.923           | 4.73E-12 | -7.803              | 6.66E-15 |
| Diagnosis - SuicidalideationPassivePast                                                                                              | 11.616          | <1.0E-10 | -8.127              | 4.44E-16 |
| Diagnosis - SuicidalideationActivenonspecificPast                                                                                    | 9.806           | <1.0E-10 | -8.806              | <1.0E-10 |
| Diagnosis - SuicidalideationActivemethodPast                                                                                         | 5.690           | 1.31E-08 | -4.593              | 4.42E-06 |
| Diagnosis - SuicidalideationActiveintentPast                                                                                         | 4.675           | 2.98E-06 | -2.855              | 4.31E-03 |
| Diagnosis - SuicidalideationActiveplanPast                                                                                           | 0.173           | 8.62E-01 | -3.116              | 1.84E-03 |
| Diagnosis - PreparatoryActionstowardimminentSuicidalbehaviorPast                                                                     | 3.824           | 1.32E-04 | -3.112              | 1.86E-03 |
| Diagnosis - InterruptedAttemptPast                                                                                                   | 1.529           | 1.26E-01 | -3.150              | 1.64E-03 |
| Diagnosis - AbortedAttemptPast                                                                                                       | 2.419           | 1.56E-02 | -4.424              | 9.81E-06 |
| Diagnosis - SuicideAttemptPast                                                                                                       | 5.612           | 2.06E-08 | -4.807              | 1.56E-06 |
| Diagnosis - SLEEP PROBLEMS, Present                                                                                                  | 10.663          | <1.0E-10 | -8.428              | <1.0E-10 |
| Diagnosis - SLEEP PROBLEMS, Past                                                                                                     | 10.470          | <1.0E-10 | -6.909              | 5.19E-12 |

**Supplementary Table 3. The longitudinal association between childrens' behavioral problems subscores (TotProb CBCL Syndrome Sub-Scales) and the family conflict score using structural equation modelling.** Beta 1 and the corresponding p-value 1 indicate the association between the family conflict score and behavioral problems subscores both at baseline. Beta 2 and the corresponding p-value 2 indicate the longitudinal association between the family conflict scores at baseline and the behavioral problems subscores at the one-year follow-up. Beta 3 and the corresponding p-value 3 indicate the longitudinal association between the behavioral problems subscores at baseline and the family conflict score at the one-year follow-up. Beta 4 and the corresponding p-value 4 indicate the association between the family conflict score and behavioral problems subscores both at the one-year follow-up. A star indicates a significant effect after FDR correction ( $p < 0.05$ ).

| Behavioral problems subscores | Beta 1 | p-value 1 | Beta 2 | p-value 2 | Beta 3 | p-value 3 | Beta 4 | p-value 4 |
|-------------------------------|--------|-----------|--------|-----------|--------|-----------|--------|-----------|
| cbcl_scr_07_ocd_r             | 0.035  | 0.038     | 0.006  | 0.064     | 0.051  | 0.001*    | 0.036  | 0.035     |
| cbcl_scr_07_sct_r             | 0.062  | <0.001*   | 0.012  | 0.354     | 0.042  | 0.005*    | 0.05   | 0.002*    |
| cbcl_scr_07_stress_r          | 0.093  | <0.001*   | 0.01   | 0.442     | 0.083  | <0.001*   | 0.093  | <0.001*   |
| cbcl_scr_dsm5_adhd_r          | 0.093  | <0.001*   | 0.012  | 0.278     | 0.088  | <0.001*   | 0.072  | <0.001*   |
| cbcl_scr_dsm5_anxdisord_r     | 0.025  | 0.125     | <0.001 | 0.97      | 0.042  | 0.006*    | 0.025  | 0.135     |
| cbcl_scr_dsm5_conduct_r       | 0.142  | <0.001*   | 0.025  | 0.061     | 0.11   | <0.001*   | 0.111  | <0.001*   |
| cbcl_scr_dsm5_depress_r       | 0.084  | <0.001*   | 0.042  | 0.003*    | 0.079  | <0.001*   | 0.071  | <0.001*   |
| cbcl_scr_dsm5_opposit_r       | 0.145  | <0.001*   | 0.026  | 0.031*    | 0.1    | <0.001*   | 0.108  | <0.001*   |
| cbcl_scr_dsm5_somaticpr_r     | 0.018  | 0.255     | 0.01   | 0.475     | 0.006  | 0.657     | 0.016  | 0.346     |
| cbcl_scr_syn_aggressive_r     | 0.143  | <0.001*   | 0.021  | 0.101     | 0.102  | <0.001*   | 0.111  | <0.001*   |
| cbcl_scr_syn_anxdep_r         | 0.037  | 0.021*    | 0.009  | 0.464     | 0.059  | <0.001*   | 0.046  | 0.007*    |
| cbcl_scr_syn_attention_r      | 0.103  | <0.001*   | 0.001  | 0.945     | 0.087  | <0.001*   | 0.069  | <0.001*   |
| cbcl_scr_syn_external_r       | 0.148  | <0.001*   | 0.019  | 0.132     | 0.11   | <0.001*   | 0.115  | <0.001*   |
| cbcl_scr_syn_internal_r       | 0.055  | 0.001*    | 0.017  | 0.171     | 0.059  | <0.001*   | 0.049  | 0.004*    |
| cbcl_scr_syn_rulebreak_r      | 0.131  | <0.001*   | 0.024  | 0.067     | 0.107  | <0.001*   | 0.098  | <0.001*   |
| cbcl_scr_syn_social_r         | 0.073  | <0.001*   | 0.029  | 0.031*    | 0.078  | <0.001*   | 0.073  | <0.001*   |
| cbcl_scr_syn_somatic_r        | 0.028  | 0.086     | 0.011  | 0.434     | 0.024  | 0.103     | 0.022  | 0.189     |
| cbcl_scr_syn_thought_r        | 0.086  | <0.001*   | 0.015  | 0.293     | 0.078  | <0.001*   | 0.047  | 0.006*    |
| cbcl_scr_syn_totprob_r        | 0.118  | <0.001*   | 0.014  | 0.225     | 0.101  | <0.001*   | 0.087  | <0.001*   |
| cbcl_scr_syn_withdep_r        | 0.08   | <0.001*   | 0.034  | 0.019*    | 0.056  | <0.001*   | 0.051  | 0.002*    |

**Supplementary Table 4. The longitudinal association between the childrens' behavioral problems subscores (TotProb CBCL Syndrome Sub-Scales) and the parental monitoring score using structural equation modelling.** Beta 1 and the corresponding p-value 1 indicate the association between the parental monitoring score and the behavioral problems subscores both at baseline. Beta 2 and the corresponding p-value 2 indicates the longitudinal association between the parental monitoring score at baseline and the behavioral problems subscores at the one-year follow-up. Beta 3 and the corresponding p-value 3 indicate the longitudinal association between the behavioral problems subscores at baseline and the parental monitoring score at the one-year follow-up. Beta 4 and the corresponding p-value 4 indicate the association between the behavioral problems subscores and the parental monitoring scores both at the one-year follow-up. A star indicates a significant effect after FDR correction ( $p < 0.05$ ).

| Parental monitoring score | beta 1 | p-value 1 | beta 2 | p-value 2 | beta 3 | p-value 3 | beta 4 | P-value 4 |
|---------------------------|--------|-----------|--------|-----------|--------|-----------|--------|-----------|
| cbcl_scr_07 OCD_r         | -0.014 | 0.016*    | -0.026 | 0.043     | -0.047 | 0.003*    | -0.029 | 0.094     |
| cbcl_scr_07 SCT_r         | -0.093 | <0.001*   | -0.049 | <0.001*   | -0.089 | <0.001*   | -0.065 | <0.001*   |
| cbcl_scr_07 Stress_r      | -0.102 | <0.001*   | -0.031 | 0.013*    | -0.082 | <0.001*   | -0.058 | 0.001*    |
| cbcl_scr_dsm5 ADHD_r      | -0.114 | <0.001*   | -0.022 | 0.051     | -0.115 | <0.001*   | -0.038 | 0.03*     |
| cbcl_scr_dsm5 Anxdisord_r | -0.068 | <0.001*   | -0.032 | 0.01*     | -0.046 | 0.002*    | -0.033 | 0.052     |
| cbcl_scr_dsm5 Conduct_r   | -0.122 | <0.001*   | -0.015 | 0.259     | -0.041 | 0.02*     | -0.062 | 0.002*    |
| cbcl_scr_dsm5 Depress_r   | -0.082 | <0.001*   | -0.048 | 0.001*    | -0.077 | <0.001*   | -0.077 | <0.001*   |
| cbcl_scr_dsm5 Opposit_r   | -0.08  | <0.001*   | -0.031 | 0.009*    | -0.072 | <0.001*   | -0.049 | 0.004*    |
| cbcl_scr_dsm5 Somaticpr_r | 0.006  | 0.698     | -0.014 | 0.365     | -0.014 | 0.32      | -0.028 | 0.082     |
| cbcl_scr_syn Aggressive_r | -0.088 | <0.001*   | -0.021 | 0.069     | -0.066 | <0.001*   | -0.038 | 0.027*    |
| cbcl_scr_syn Anxdep_r     | -0.067 | <0.001*   | -0.035 | 0.003*    | -0.046 | 0.003*    | -0.035 | 0.044     |
| cbcl_scr_syn Attention_r  | -0.143 | <0.001*   | -0.035 | 0.002*    | -0.139 | <0.001*   | -0.055 | 0.003*    |
| cbcl_scr_syn External_r   | -0.101 | <0.001*   | -0.019 | 0.118     | -0.067 | <0.001*   | -0.047 | 0.01*     |
| cbcl_scr_syn Internal_r   | -0.078 | <0.001*   | -0.039 | 0.002*    | -0.053 | <0.001*   | -0.066 | <0.001*   |
| cbcl_scr_syn Rulebreak_r  | -0.112 | <0.001*   | -0.019 | 0.168     | -0.054 | 0.002*    | -0.059 | 0.003*    |
| cbcl_scr_syn Social_r     | -0.107 | <0.001*   | -0.029 | 0.03*     | -0.091 | <0.001*   | -0.039 | 0.03*     |
| cbcl_scr_syn Somatic_r    | -0.009 | 0.586     | -0.019 | 0.179     | -0.022 | 0.112     | -0.04  | 0.013*    |
| cbcl_scr_syn Thought_r    | -0.093 | <0.001*   | -0.023 | 0.093     | -0.066 | <0.001*   | -0.05  | 0.006*    |
| cbcl_scr_syn Totprob_r    | -0.12  | <0.001*   | -0.031 | 0.007*    | -0.094 | <0.001*   | -0.061 | 0.001*    |
| cbcl_scr_syn Withdep_r    | -0.125 | <0.001*   | -0.048 | 0.001*    | -0.064 | <0.001*   | -0.097 | <0.001*   |

**Supplementary Table 5. The mediation by the 19 behavioral problems subscores for the association between cortical areas in the children and the family conflict.** The analysis is analogous to that shown in Fig. 3C, but here is for subscores, instead of behavioral problems total scores. The paths correspond to those shown in Fig. 3C. All subscores except *cbcl\_scr\_dsm5\_somaticpr* were found to mediate the relation between cortical areas and family conflict in this analysis after FDR correction ( $p < 0.05$ ).

| Behavioral problems subscores  | Path A |          | Path B |          | Path C |          | Path C' |          | Path AB |          |
|--------------------------------|--------|----------|--------|----------|--------|----------|---------|----------|---------|----------|
|                                | beta   | p-value  | beta   | p-value  | beta   | p-value  | beta    | p-value  | beta    | p-value  |
| <i>cbcl_scr_syn_anxdep</i>     | -0.044 | 3.18E-05 | 0.054  | 5.01E-07 | -0.070 | 4.40E-11 | -0.068  | 1.90E-10 | -0.002  | 1.53E-03 |
| <i>cbcl_scr_syn_withdep</i>    | -0.056 | 2.06E-07 | 0.090  | <1.0E-10 | -0.070 | 4.40E-11 | -0.065  | 8.31E-10 | -0.005  | 1.07E-05 |
| <i>cbcl_scr_syn_somatic</i>    | -0.030 | 4.79E-03 | 0.046  | 1.86E-05 | -0.070 | 4.40E-11 | -0.069  | 1.02E-10 | -0.001  | 2.08E-02 |
| <i>cbcl_scr_syn_social</i>     | -0.070 | 4.60E-11 | 0.096  | <1.0E-10 | -0.070 | 4.40E-11 | -0.064  | 2.31E-09 | -0.007  | 1.23E-07 |
| <i>cbcl_scr_syn_thought</i>    | -0.049 | 4.23E-06 | 0.070  | 6.68E-11 | -0.070 | 4.40E-11 | -0.067  | 3.44E-10 | -0.003  | 1.90E-04 |
| <i>cbcl_scr_syn_attention</i>  | -0.088 | 2.22E-16 | 0.094  | <1.0E-10 | -0.070 | 4.40E-11 | -0.062  | 5.78E-09 | -0.008  | 2.12E-09 |
| <i>cbcl_scr_synulebreak</i>    | -0.073 | 8.76E-12 | 0.117  | <1.0E-10 | -0.070 | 4.40E-11 | -0.062  | 5.93E-09 | -0.009  | 7.42E-09 |
| <i>cbcl_scr_syn_aggressive</i> | -0.085 | 2.44E-15 | 0.135  | <1.0E-10 | -0.070 | 4.40E-11 | -0.059  | 2.79E-08 | -0.011  | 1.97E-11 |
| <i>cbcl_scr_syn_internal</i>   | -0.052 | 9.21E-07 | 0.074  | 5.30E-12 | -0.070 | 4.40E-11 | -0.067  | 4.45E-10 | -0.004  | 7.09E-05 |
| <i>cbcl_scr_syn_external</i>   | -0.086 | 6.66E-16 | 0.138  | <1.0E-10 | -0.070 | 4.40E-11 | -0.059  | 3.56E-08 | -0.012  | 7.72E-12 |
| <i>cbcl_scr_dsm5_depress</i>   | -0.058 | 7.02E-08 | 0.092  | <1.0E-10 | -0.070 | 4.40E-11 | -0.065  | 1.00E-09 | -0.005  | 5.24E-06 |
| <i>cbcl_scr_dsm5_anxdisord</i> | -0.048 | 6.24E-06 | 0.045  | 2.05E-05 | -0.070 | 4.40E-11 | -0.068  | 1.73E-10 | -0.002  | 2.21E-03 |
| <i>cbcl_scr_dsm5_somaticpr</i> | -0.023 | 3.11E-02 | 0.035  | 9.84E-04 | -0.070 | 4.40E-11 | -0.070  | 7.22E-11 | -0.001  | 8.03E-02 |
| <i>cbcl_scr_dsm5_adhd</i>      | -0.083 | 6.22E-15 | 0.089  | <1.0E-10 | -0.070 | 4.40E-11 | -0.063  | 3.61E-09 | -0.007  | 1.41E-08 |
| <i>cbcl_scr_dsm5_opposit</i>   | -0.078 | 1.95E-13 | 0.129  | <1.0E-10 | -0.070 | 4.40E-11 | -0.060  | 1.42E-08 | -0.010  | 3.38E-10 |
| <i>cbcl_scr_dsm5_conduct</i>   | -0.077 | 7.29E-13 | 0.128  | <1.0E-10 | -0.070 | 4.40E-11 | -0.061  | 1.19E-08 | -0.010  | 7.53E-10 |
| <i>cbcl_scr_07_sct</i>         | -0.039 | 2.97E-04 | 0.053  | 7.77E-07 | -0.070 | 4.40E-11 | -0.068  | 1.52E-10 | -0.002  | 3.96E-03 |
| <i>cbcl_scr_07 OCD</i>         | -0.031 | 3.31E-03 | 0.042  | 6.98E-05 | -0.070 | 4.40E-11 | -0.069  | 9.96E-11 | -0.001  | 2.05E-02 |
| <i>cbcl_scr_07_stress</i>      | -0.076 | 1.08E-12 | 0.092  | <1.0E-10 | -0.070 | 4.40E-11 | -0.063  | 2.83E-09 | -0.007  | 4.19E-08 |



**Supplementary Table 6. The mediation by the 19 behavioral problems subscores for the association between cortical areas in the children and the parental monitoring.** The analysis is analogous to that shown in Fig. 3D, but here is for subscores, instead of behavioral problems total scores. The paths correspond to those shown in Fig. 3D. All subscores except *cbcl\_scr\_syn\_somatic* and *cbcl\_scr\_dsm5\_somaticpr* were found to mediate the relation between cortical areas and family conflict in this analysis after FDR correction ( $p < 0.05$ ).

| Behavioral problems subscores  | Path A |          | Path B |          | Path C |          | Path C' |          | Path AB |          |
|--------------------------------|--------|----------|--------|----------|--------|----------|---------|----------|---------|----------|
|                                | beta   | p-value  | beta   | p-value  | beta   | p-value  | beta    | p-value  | beta    | p-value  |
| <i>cbcl_scr_syn_anxdep</i>     | -0.044 | 4.03E-05 | -0.052 | 9.75E-07 | 0.068  | 2.02E-10 | 0.066   | 7.87E-10 | 0.002   | 1.88E-03 |
| <i>cbcl_scr_syn_withdep</i>    | -0.056 | 1.62E-07 | -0.116 | <1.0E-10 | 0.068  | 2.02E-10 | 0.061   | 7.31E-09 | 0.006   | 2.53E-06 |
| <i>cbcl_scr_syn_somatic</i>    | -0.031 | 4.21E-03 | -0.024 | 2.62E-02 | 0.068  | 2.02E-10 | 0.067   | 3.17E-10 | 0.001   | 9.05E-02 |
| <i>cbcl_scr_syn_social</i>     | -0.068 | 1.54E-10 | -0.091 | <1.0E-10 | 0.068  | 2.02E-10 | 0.062   | 7.12E-09 | 0.006   | 3.36E-07 |
| <i>cbcl_scr_syn_thought</i>    | -0.050 | 2.57E-06 | -0.069 | 1.14E-10 | 0.068  | 2.02E-10 | 0.064   | 1.51E-09 | 0.003   | 1.62E-04 |
| <i>cbcl_scr_syn_attention</i>  | -0.086 | 1.11E-15 | -0.120 | <1.0E-10 | 0.068  | 2.02E-10 | 0.058   | 5.96E-08 | 0.010   | 7.15E-11 |
| <i>cbcl_scr_synulebreak</i>    | -0.072 | 1.86E-11 | -0.075 | 1.58E-12 | 0.068  | 2.02E-10 | 0.063   | 4.77E-09 | 0.005   | 1.26E-06 |
| <i>cbcl_scr_syn_aggressive</i> | -0.079 | 1.52E-13 | -0.065 | 1.33E-09 | 0.068  | 2.02E-10 | 0.063   | 4.21E-09 | 0.005   | 3.10E-06 |
| <i>cbcl_scr_syn_internal</i>   | -0.052 | 9.32E-07 | -0.073 | 8.69E-12 | 0.068  | 2.02E-10 | 0.064   | 1.85E-09 | 0.004   | 7.57E-05 |
| <i>cbcl_scr_syn_external</i>   | -0.082 | 2.18E-14 | -0.072 | 1.35E-11 | 0.068  | 2.02E-10 | 0.062   | 6.48E-09 | 0.006   | 4.57E-07 |
| <i>cbcl_scr_dsm5_depress</i>   | -0.056 | 1.59E-07 | -0.080 | 4.82E-14 | 0.068  | 2.02E-10 | 0.063   | 2.71E-09 | 0.005   | 1.87E-05 |
| <i>cbcl_scr_dsm5_anxdisord</i> | -0.049 | 5.52E-06 | -0.047 | 9.92E-06 | 0.068  | 2.02E-10 | 0.066   | 8.01E-10 | 0.002   | 1.75E-03 |
| <i>cbcl_scr_dsm5_somaticpr</i> | -0.024 | 2.76E-02 | -0.011 | 2.93E-01 | 0.068  | 2.02E-10 | 0.068   | 2.40E-10 | 0.000   | 3.80E-01 |
| <i>cbcl_scr_dsm5_adhd</i>      | -0.080 | 5.88E-14 | -0.092 | <1.0E-10 | 0.068  | 2.02E-10 | 0.061   | 1.38E-08 | 0.007   | 1.68E-08 |
| <i>cbcl_scr_dsm5_opposit</i>   | -0.075 | 2.60E-12 | -0.065 | 1.03E-09 | 0.068  | 2.02E-10 | 0.063   | 3.64E-09 | 0.005   | 4.73E-06 |
| <i>cbcl_scr_dsm5_conduct</i>   | -0.073 | 9.88E-12 | -0.081 | 2.46E-14 | 0.068  | 2.02E-10 | 0.062   | 6.25E-09 | 0.006   | 4.24E-07 |
| <i>cbcl_scr_07_sct</i>         | -0.038 | 3.29E-04 | -0.085 | 2.00E-15 | 0.068  | 2.02E-10 | 0.065   | 1.26E-09 | 0.003   | 1.15E-03 |
| <i>cbcl_scr_07 OCD</i>         | -0.033 | 1.80E-03 | -0.043 | 6.72E-05 | 0.068  | 2.02E-10 | 0.067   | 4.70E-10 | 0.001   | 1.59E-02 |
| <i>cbcl_scr_07_stress</i>      | -0.075 | 2.18E-12 | -0.075 | 2.02E-12 | 0.068  | 2.02E-10 | 0.062   | 5.45E-09 | 0.006   | 7.49E-07 |

**Supplementary Figure 1.** The brain regions with their cortical areas correlated with the family conflict score (left) and parental monitoring score (right). Results with two random choices of siblings are presented.

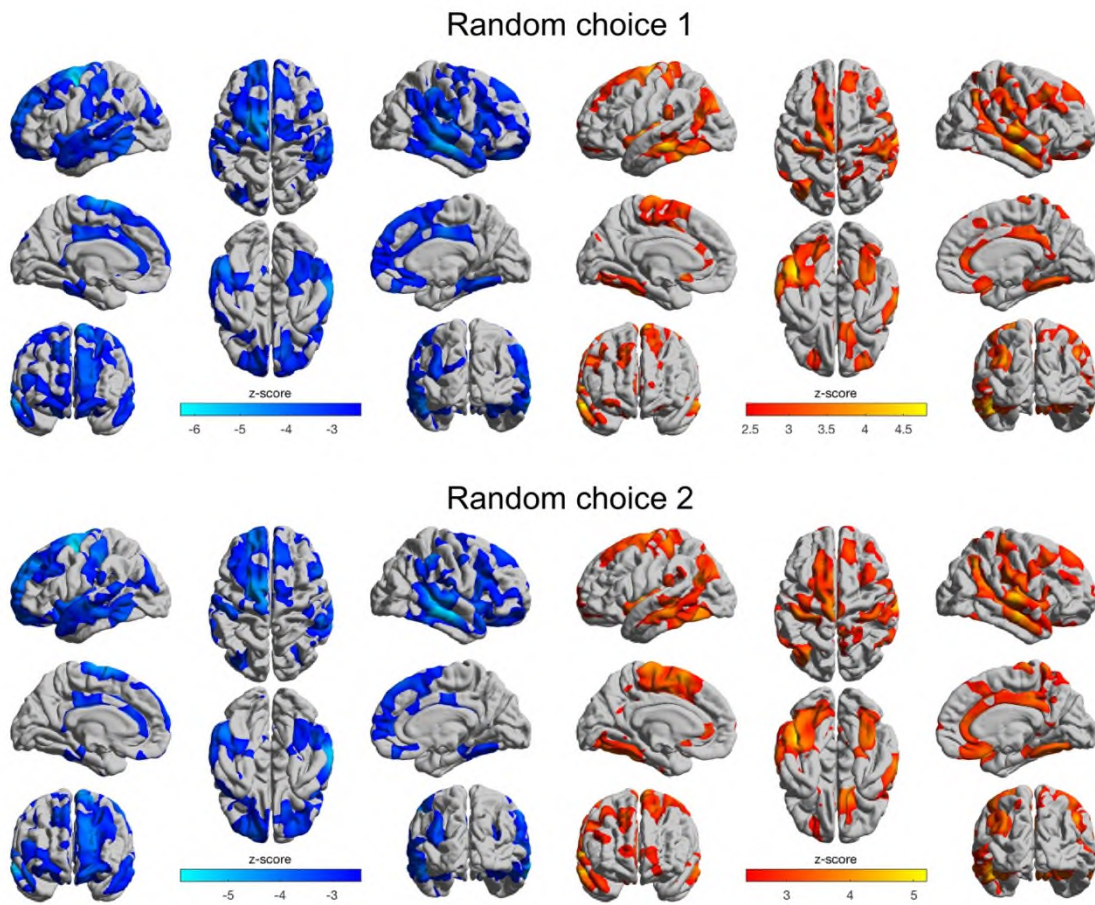

---

**Supplementary Figure 2. The brain regions with their cortical volumes correlated with the family conflict score and parental monitoring score. a)** The volumes of brain regions that were significantly correlated with the family conflict score (FDR  $p < 0.05$  corrected). The blue color indicates that lower cortical volumes were correlated with more severe family conflict scores. **b)** The volumes of brain regions that were significantly correlated with the parental monitoring score (FDR  $p < 0.05$  corrected). The red color indicates that higher cortical volumes were correlated with more positive parental monitoring.

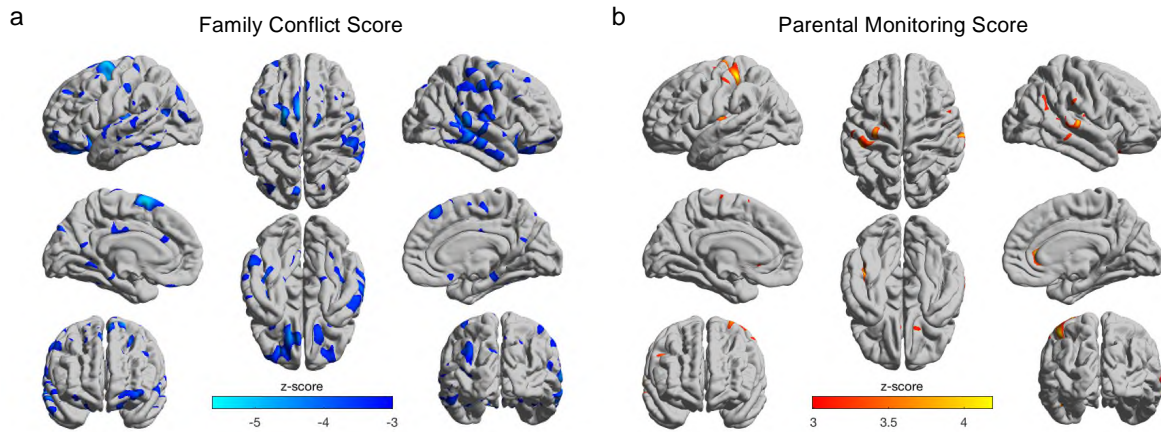

**Supplementary Figure 3.** **a)** A scatter plot of the vertex-wise z-statistics of the family conflict scores with cortical area and with cortical volume. Each point reflects the association between family conflict scores and the areas or volume of one vertex. **b)** A scatter plot of the vertex-wise z-statistics of the parental monitoring scores with cortical area and with cortical volume. **c)** A scatter plot of the vertex-wise mean cortical area and cortical volume.

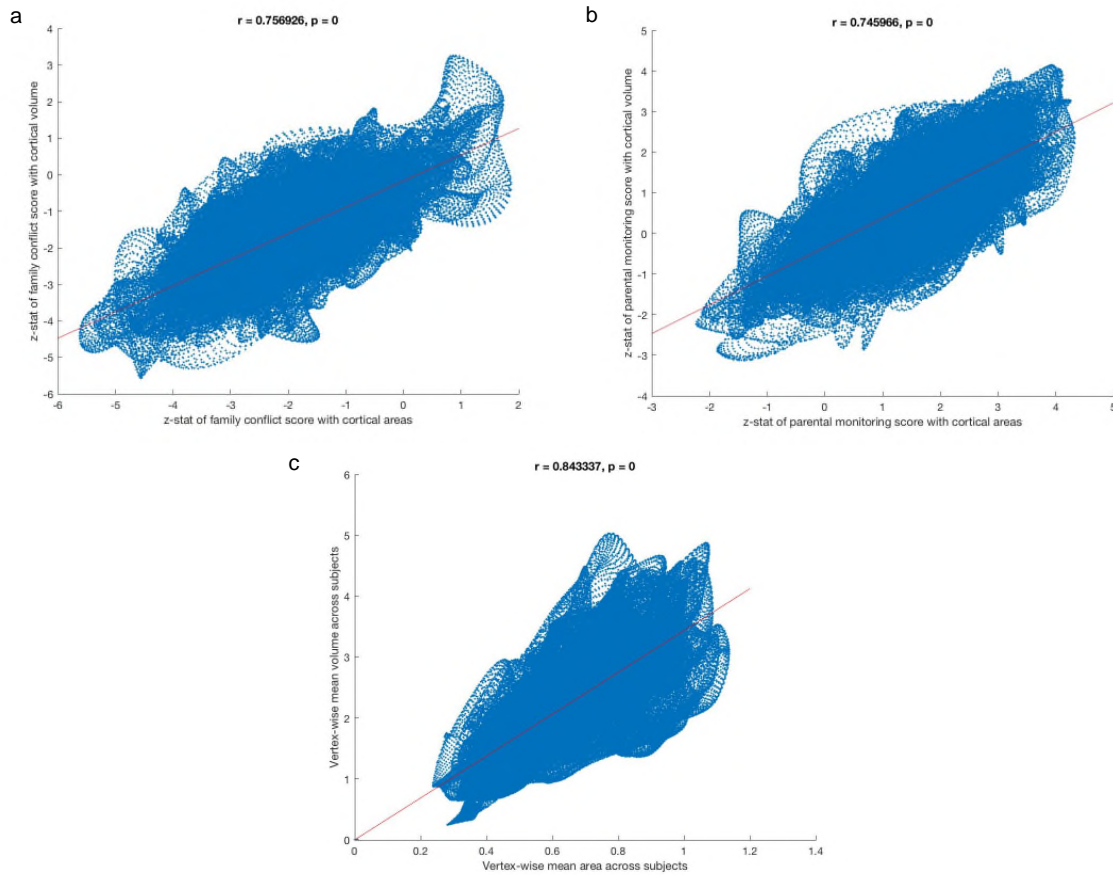

**Supplementary Figure 4.** A mediation analysis showed the cortical areas significantly mediate the association between the parental monitoring scores and behavioral problem scores. All statistical tests here are two-sided, and pass Bonferroni correction ( $p < 0.05$ ).

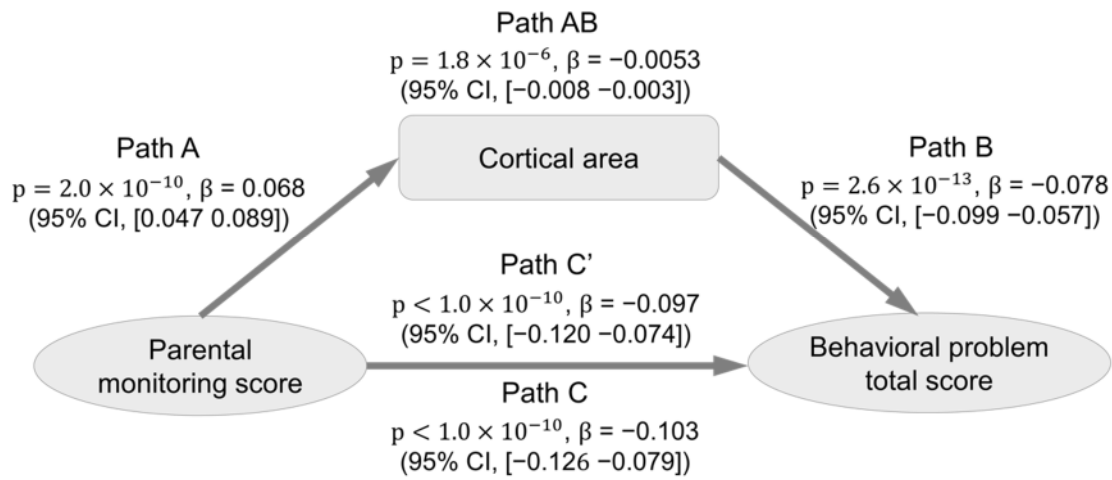

**Supplementary Figure 5.** a) A mediation analysis showed that the behavioral problem scores significantly mediate the association between the childrens' cortical area and the family conflict scores. b) A mediation analysis showed that the behavioral problems scores significantly mediate the association between the childrens' cortical area and the parental monitoring scores.

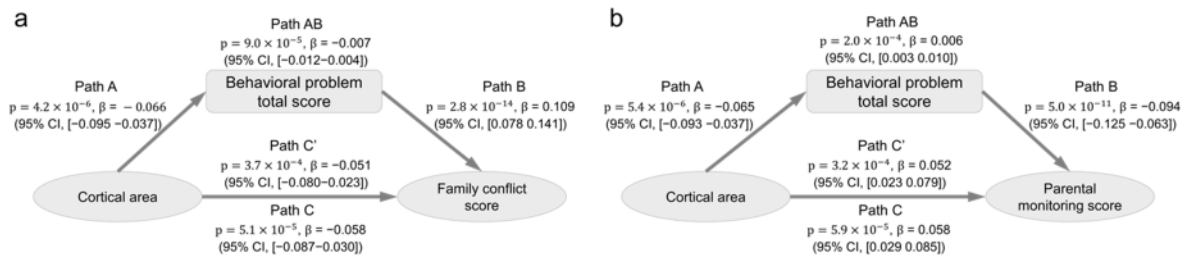

Supplement: 41467_2021_23994_MOESM1_ESM.pdf [file 41467_2021_23994_MOESM1_ESM.pdf]
